# Supplementary material for: Relationship between Parkinson’s disease and cardio-cerebrovascular diseases: a Mendelian randomized study
Source: PubMed Central journal article supplement (PMC10665329; doi:10.1038/s41598-023-47708-2), 2023-11-22
Supplement: 41598_2023_47708_MOESM2_ESM.pdf [file 41598_2023_47708_MOESM2_ESM.pdf]

**Relationship between Parkinson's disease and cardiovascular diseases: a Mendelian randomized study**

Zhongzheng Zhou, Muzi Zhang, Qinghua Fang, Jing Huang

| SNP         | CHR | POS       | Beta  | SE   | P        | EA | NEA | EAF  | F     |
|-------------|-----|-----------|-------|------|----------|----|-----|------|-------|
| rs35749011  | 1   | 155135036 | 0.75  | 0.07 | 5.02E-30 | A  | G   | 0.02 | 5376  |
| rs823106    | 1   | 205656453 | -0.15 | 0.02 | 4.10E-10 | C  | G   | 0.85 | 2425  |
| rs4613239   | 2   | 169119609 | 0.18  | 0.02 | 6.21E-13 | G  | C   | 0.13 | 3155  |
| rs6741007   | 2   | 135537119 | -0.12 | 0.02 | 2.09E-12 | G  | T   | 0.45 | 3440  |
| rs4488803   | 3   | 58218352  | -0.11 | 0.02 | 1.08E-08 | A  | G   | 0.37 | 2723  |
| rs10513789  | 3   | 182760073 | -0.16 | 0.02 | 3.18E-13 | G  | T   | 0.18 | 3206  |
| rs7695720   | 4   | 77183300  | -0.13 | 0.02 | 1.53E-09 | C  | A   | 0.21 | 2224  |
| rs34311866  | 4   | 951947    | 0.23  | 0.02 | 7.97E-23 | C  | T   | 0.2  | 7191  |
| rs4698412   | 4   | 15737348  | 0.13  | 0.02 | 7.05E-14 | A  | G   | 0.55 | 3440  |
| rs356203    | 4   | 90666041  | -0.24 | 0.02 | 3.01E-41 | T  | C   | 0.62 | 12150 |
| rs75646569  | 5   | 60345424  | 0.19  | 0.03 | 5.62E-13 | G  | T   | 0.11 | 3412  |
| rs35265698  | 6   | 32561334  | -0.2  | 0.03 | 3.93E-11 | G  | C   | 0.15 | 4923  |
| rs858295    | 7   | 23245569  | -0.1  | 0.02 | 3.83E-09 | G  | A   | 0.39 | 1148  |
| rs620490    | 8   | 16697579  | -0.12 | 0.02 | 6.46E-10 | G  | T   | 0.28 | 2302  |
| rs144814361 | 10  | 121410917 | 0.44  | 0.07 | 9.07E-11 | T  | C   | 0.02 | 1850  |
| rs329647    | 11  | 133764666 | -0.11 | 0.02 | 1.94E-10 | C  | G   | 0.67 | 2621  |
| rs75505347  | 12  | 40885549  | 0.39  | 0.07 | 6.12E-09 | T  | C   | 0.02 | 1453  |
| rs10847864  | 12  | 123326598 | 0.13  | 0.02 | 9.81E-13 | T  | G   | 0.36 | 3203  |
| rs4774417   | 15  | 61993702  | 0.11  | 0.02 | 4.63E-08 | A  | G   | 0.74 | 1902  |
| rs12934900  | 16  | 30923602  | 0.12  | 0.02 | 4.33E-11 | T  | A   | 0.66 | 3162  |
| rs58879558  | 17  | 44095467  | -0.24 | 0.03 | 1.36E-21 | C  | T   | 0.22 | 8764  |
| rs10451230  | 17  | 16035225  | -0.1  | 0.02 | 4.42E-08 | T  | A   | 0.57 | 1926  |
| rs4588066   | 18  | 40672964  | 0.1   | 0.02 | 4.45E-09 | A  | G   | 0.33 | 2100  |

**Supplementary table S1: Details of the PD-related Exposure data included in the study**
